# Supplementary material
Source: HighWire-hosted journal article supplement (https://thorax.bmj.com/content/73/1/78)
Supplement: inline-supplementary-material-1 [file inline-supplementary-material-1.pdf]

## **Online Supplement 1: Lung function tests interpretation. lessons from French training in respiratory medicine**

### **Respiratory training in France and Europe:**

In France, medical training is organised in 3 main steps. (i) From the first to the third year, medical students have fundamental training in science, physiology, pathophysiology and semiology. (ii) From the 4<sup>th</sup> to the 6<sup>th</sup> year, they are trained on diseases and their management. They attend daily practical training in hospitals and are involved in patients care. The 6<sup>th</sup> year is roughly equivalent to the English foundation year. At the end of this 6<sup>th</sup> year, medical students have a national exam. Ranking obtained at this national exam determines the choice of their speciality accordingly and the city where they will do their residency. (iii) The residency lasts from the 7<sup>th</sup> to the 10<sup>th</sup> year. The choice of speciality is performed from the beginning of the residency. Therefore, residents follow dedicated training from the first year of their residency.

French respiratory training lasts 8 semesters. Respiratory trainees have to do 4 semesters on respiratory wards. They are also encouraged to do a semester in a LFT laboratory and in an intensive care unit. They can freely choose two semesters depending on their field of interest. Theoretical training is provided during inter-regional seminars. They are held every four months and are independently organised by 7 academic districts (East, Centre, North-West, Paris, South, South-West, South). Each academic district establishes its own training program in accordance to national guidelines. One academic district (South) incorporates HERMES curriculum for the training of its respiratory residents.

At the end of their 8 semesters of training, each trainee presents a dissertation to the professorial committee of their Academic district. This dissertation usually consists of a clinical study. This dissertation gives them the title of Respiratory Specialist. Trainees also need to present a Thesis in their local hospital in order to qualify as doctors.

Across Europe, the duration of respiratory residency is highly variable in its length and organisation. In Germany, Switzerland, United Kingdom and Belgium, residency is divided into two parts: one with a general training and one with the training of the speciality. In France, Spain, Italy and Portugal, the residency is only dedicated to the speciality but allows placements in other specialities. The length of the residency also varies: 4 years (Spain, France), 5 years (Italy, Portugal), 6 years (Netherlands, Switzerland, Belgium), 8 years (United Kingdom, Germany).

Table 1 – Online supplement : Baseline characteristics of responders to the questionnaire that had an internship in a LFT lab and of those who did not (SD: standard deviation)

|                                                                                                |                                                          | Responders without any internship in a LFT lab |                 | Responders that had an internship in a LFT lab |                 |
|------------------------------------------------------------------------------------------------|----------------------------------------------------------|------------------------------------------------|-----------------|------------------------------------------------|-----------------|
|                                                                                                |                                                          | Frequency / Mean                               | Percentage / SD | Frequency / Mean                               | Percentage / SD |
| <b>Region of training</b>                                                                      | East                                                     | 37                                             | 17.1 %          | 3                                              | 6.5 %           |
|                                                                                                | Paris                                                    | 32                                             | 14.8 %          | 19                                             | 41.3 %          |
|                                                                                                | North-West                                               | 62                                             | 28.7 %          | 9                                              | 19.6 %          |
|                                                                                                | West                                                     | 27                                             | 33.3 %          | 4                                              | 8.7 %           |
|                                                                                                | Center                                                   | 25                                             | 11.6 %          | 2                                              | 43.5 %          |
|                                                                                                | South                                                    | 33                                             | 15.3 %          | 4                                              | 8.7 %           |
| <b>Gender (male)</b>                                                                           |                                                          | 122                                            | 47.2            | 21                                             | 51.2 %          |
| <b>Age (years)</b>                                                                             |                                                          | 27.0                                           | 1.7             | 27.9                                           | 2.6             |
| <b>Ranking at final national medical school test</b>                                           | First 500                                                | 19                                             | 8.9 %           | 9                                              | 22.0 %          |
|                                                                                                | Between 500 - 1000                                       | 35                                             | 16.2 %          | 11                                             | 26.8 %          |
|                                                                                                | Between 1000 - 2000                                      | 66                                             | 30.6 %          | 11                                             | 26.8 %          |
|                                                                                                | Between 2000 - 3000                                      | 39                                             | 18.1 %          | 5                                              | 12.2 %          |
|                                                                                                | Above 3000                                               | 48                                             | 22.2 %          | 4                                              | 9.8 %           |
|                                                                                                | No answer                                                | 9                                              | 4.2 %           | 1                                              | 2.4 %           |
| <b>Number of semesters as respiratory resident</b>                                             |                                                          | 3.7                                            | 2.2             | 4.8                                            | 2.3             |
| <b>Number of semesters as respiratory resident on respiratory wards</b>                        |                                                          | 2.5                                            | 1.6             | 3.3                                            | 1.7             |
| <b>Internship in a LFT laboratory (yes)</b>                                                    |                                                          | 0                                              | 0.0 %           | 41                                             | 100.0 %         |
| <b>Self-assessed knowledge of LFT at the end of medical school</b>                             | No knowledge                                             | 14                                             | 6.5 %           | 0                                              | 0.0 %           |
|                                                                                                | Minimal knowledge                                        | 68                                             | 31.5 %          | 12                                             | 29.3 %          |
|                                                                                                | Basic knowledge                                          | 96                                             | 44.4 %          | 23                                             | 56.1 %          |
|                                                                                                | Good knowledge                                           | 36                                             | 16.7 %          | 6                                              | 14.6 %          |
|                                                                                                | No answer                                                | 2                                              | 0.9 %           | 0                                              | 0.0 %           |
| <b>Dedicated theoretical training on LFT organised by the academic district (yes)</b>          |                                                          | 49                                             | 22.7 %          | 23                                             | 56.1 %          |
| <b>Dedicated theoretical training on LFT not organised by the academic district (yes)</b>      |                                                          | 42                                             | 19.4 %          | 14                                             | 34.1 %          |
| <b>Read at least one textbook on respiratory physiology (yes)</b>                              |                                                          | 65                                             | 30.0 %          | 17                                             | 41.5 %          |
| <b>Interpretation of LFT outside a dedicated internship</b>                                    | No                                                       | 209                                            | 96.8 %          | 14                                             | 34.1 %          |
|                                                                                                | Yes                                                      | 5                                              | 2.3 %           | 27                                             | 65.9 %          |
|                                                                                                | No answer                                                | 2                                              | 0.9 %           | 0                                              | 0.0 %           |
| <b>Projected self-perceived skills on LFT interpretation at the end of speciality training</b> | Will have no capacity at all to interpret LFT            | 9                                              | 4.2 %           | 3                                              | 7.3 %           |
|                                                                                                | Will only be able to interpret simple LFT                | 67                                             | 31.0 %          | 9                                              | 22.0 %          |
|                                                                                                | Will be able to interpret LFT of intermediate difficulty | 93                                             | 43.1 %          | 20                                             | 48.8 %          |
|                                                                                                | Will be able to interpret all LFT                        | 37                                             | 17.1 %          | 9                                              | 22.0 %          |
|                                                                                                | No answer                                                | 10                                             | 4.6 %           | 0                                              | 0.0 %           |
